# Supplementary material
Source: publisher figshare collection journal article supplement (https://asha.figshare.com/articles/dataset/_/14080193)
Supplement: Supplementary file 1 [file 1]

**Supplemental Material S1.** Number correct production of specific types of complex syntax by group.

| <b>Construct</b>              | <b>CHL<br/>Mean (SD)</b> | <b>CNH-Age<br/>Mean (SD)</b> | <b>CNH-MLU<br/>Mean (SD)</b> | <b>Total N</b> | <b>H</b> | <b><i>p</i></b> |
|-------------------------------|--------------------------|------------------------------|------------------------------|----------------|----------|-----------------|
| Coordinated Clause            | 5.56 (5.27)              | 11.42 (6.99)                 | 6.40 (7.84)                  | 72             | 15.217   | < .001          |
| Subordinate Clause            | 4.19 (4.53)              | 6.77 (4.35)                  | 4.50 (3.53)                  | 72             | 6.589    | .037            |
| Reduced Infinitive            | 1.23 (1.73)              | 2.12 (4.17)                  | 1.75 (2.59)                  | 72             | .487     | .784            |
| Simple Infinitive             | 3.96 (4.52)              | 8.54 (6.35)                  | 3.75 (3.32)                  | 72             | 15.133   | .001            |
| Unmarked Infinitive           | 0.15 (0.46)              | 0.27 (0.83)                  | 0.05 (0.22)                  | 72             | 1.269    | .530            |
| Let's Clause                  | 0.08 (0.27)              | 0.27 (0.67)                  | 0.05 (0.22)                  | 72             | 2.861    | .239            |
| Wh- Nonfinite Clause          | 0.19 (0.63)              | 0.31 (1.19)                  | 0.05 (0.22)                  | 72             | .734     | .693            |
| Wh- Finite Clause             | 0.65 (1.09)              | 1.38 (1.96)                  | 0.80 (0.89)                  | 72             | 1.925    | .382            |
| Full Propositional Complement | 0.77 (1.18)              | 1.69 (1.69)                  | 0.90 (1.25)                  | 72             | 5.204    | .074            |
| Subject Relative Clause       | 0.22 (0.42)              | 1.15 (1.59)                  | 0.65 (0.99)                  | 72             | 5.117    | .077            |
| Object Relative Clause        | 0.31 (0.84)              | 0.73 (1.15)                  | 0.30 (0.80)                  | 72             | 4.635    | .099            |
| Oblique Relative Clause       | 0.08 (0.27)              | 0.08 (0.27)                  | 0.05 (0.22)                  | 72             | .160     | .923            |
| Adjunct Relative Clause       | 0.08 (0.39)              | 0.08 (0.27)                  | 0.05 (0.22)                  | 72             | .333     | .847            |
| Headless Relative Clause      | 0.46 (1.10)              | 0.81 (1.10)                  | 0.35 (0.67)                  | 72             | 3.172    | .205            |
| Participle Clause             | 0.27 (0.53)              | 0.62 (0.90)                  | 0.65 (1.39)                  | 72             | 2.046    | .359            |

*Note:* CHL = children with hearing loss; CNH = children with normal hearing.
