# Supplementary material
Source: publisher figshare collection journal article supplement (https://asha.figshare.com/articles/dataset/_/14080193)
Supplement: Supplementary file 2 [file 1]

**Supplemental Material S2.** Percent correct production of specific types of complex syntax by group.

| <b>Construct</b>              | <b>CHL<br/>Mean (<i>SD</i>)</b> | <b>CNH-Age<br/>Mean (<i>SD</i>)</b> | <b>CNH-MLU<br/>Mean (<i>SD</i>)</b> | <b>Total N</b> | <b>H</b> | <b><i>p</i></b> |
|-------------------------------|---------------------------------|-------------------------------------|-------------------------------------|----------------|----------|-----------------|
| Coordinated Clause            | 88.90 (15.73)                   | 94.18 (9.49)                        | 89.21 (26.56)                       | 67             | 2.134    | .344            |
| Subordinate Clause            | 88.96 (25.03)                   | 98.41 (3.96)                        | 97.37 (8.35)                        | 66             | 1.717    | .424            |
| Reduced Infinitive            | 100 (0.00)                      | 99.72 (1.16)                        | 100 (0.00)                          | 43             | 1.529    | .465            |
| Simple Infinitive             | 80.44 (27.74)                   | 98.00 (6.45)                        | 88.34 (19.05)                       | 60             | 8.721    | .013            |
| Unmarked Infinitive           | 25.00 (46.29)                   | 60.40 (54.23)                       | 100 (--)                            | 14             | 3.809    | .149            |
| Let's Clause                  | 100 (0.00)                      | 100 (0.00)                          | 100 (--)                            | 9              | .000     | 1.00            |
| Wh- Nonfinite Clause          | 100 (0.00)                      | 100 (0.00)                          | 100 (--)                            | 7              | .000     | 1.00            |
| Wh- Finite Clause             | 81.82 (40.45)                   | 87.18 (24.68)                       | 100 (0.00)                          | 35             | 2.599    | .273            |
| Full Propositional Complement | 71.86 (43.76)                   | 100 (0.00)                          | 100 (0.00)                          | 42             | 11.043   | .004            |
| Subject Relative Clause       | 50.00 (46.29)                   | 89.75 (28.49)                       | 88.89 (33.33)                       | 30             | 6.933    | .031            |
| Object Relative Clause        | 65.00 (48.73)                   | 97.50 (7.91)                        | 62.50 (47.87)                       | 19             | 3.473    | .176            |
| Oblique Relative Clause       | 66.67 (57.74)                   | 66.67 (57.74)                       | 100 (--)                            | 7              | .400     | .819            |
| Adjunct Relative Clause       | 100 (--)                        | 100 (0.00)                          | 100 (--)                            | 4              | .000     | 1.00            |
| Headless Relative Clause      | 100 (0.00)                      | 82.69 (37.34)                       | 71.43 (48.80)                       | 26             | 1.917    | .383            |
| Participle Clause             | 78.57 (39.34)                   | 87.88 (30.81)                       | 100 (0.00)                          | 25             | 2.151    | .341            |

*Note:* CHL = children with hearing loss; CNH = children with normal hearing.
